# Supplementary material for: Association between Age-Friendliness of Communities and Frailty among Older Adults: A Multilevel Analysis
Source: MDPI journal article supplement (doi:10.3390/ijerph19127528), 2022-06-20
Supplement: s1 [file s1]

**Table S1: Age-friendly Community Evaluation Scale.** (Residential environment: The following questions are about your neighborhoods and the description of environment related problems, please according to your actual feeling, choose one of the following options: 1: completely disagree, 2: disagree, 3: generally, neither agree nor disagree (neutral), 4: agree, 5: completely agree).

|                                                                                                                                                                                                    |   |   |   |   |   |
|----------------------------------------------------------------------------------------------------------------------------------------------------------------------------------------------------|---|---|---|---|---|
| <b>A Housing</b>                                                                                                                                                                                   |   |   |   |   |   |
| 1. No financial pressure on housing (e.g. mortgage, rent, etc.)                                                                                                                                    | 1 | 2 | 3 | 4 | 5 |
| 2. The water, electricity and coal of the house are well equipped and can be used normally                                                                                                         | 1 | 2 | 3 | 4 | 5 |
| 3. The housing can meet the needs of safety, convenience, comfort and hygiene (such as anti-skid floor, handrails, ramps or elevators for wheelchair access, etc.)                                 | 1 | 2 | 3 | 4 | 5 |
| <b>B Transportation</b>                                                                                                                                                                            |   |   |   |   |   |
| 1. There are safe and reliable public transportation, convenient for going out                                                                                                                     | 1 | 2 | 3 | 4 | 5 |
| 2. There are many public transportations, the carriage is not crowded, and there are special seats for the elderly, the sick, the disabled and pregnant                                            | 1 | 2 | 3 | 4 | 5 |
| 3. Even in places inaccessible by public transport, there are convenient means of transportation such as free shuttle buses                                                                        | 1 | 2 | 3 | 4 | 5 |
| 4. There are enough seats for the elderly in buses and subways (other people will offer seats for the elderly when there are not enough seats for them)                                            | 1 | 2 | 3 | 4 | 5 |
| 5. The bus runs smoothly, and the driver makes sure that it is safe to leave after the stop                                                                                                        | 1 | 2 | 3 | 4 | 5 |
| 6. It is easy to get to the destination by public transport (e.g. the bus route and timetable at the station are clearly indicated, and the boarding and boarding are safe and barrier-free, etc.) | 1 | 2 | 3 | 4 | 5 |
| 7. The bus station has suitable hardware facilities (such as seats, awnings, etc.), and the waiting environment is comfortable                                                                     | 1 | 2 | 3 | 4 | 5 |
| <b>C Built Environment</b>                                                                                                                                                                         |   |   |   |   |   |
| 1. Community public Spaces (such as roads, parks, etc.) are clean, tidy and well maintained                                                                                                        | 1 | 2 | 3 | 4 | 5 |
| 2. It's easy to walk or park from my house                                                                                                                                                         | 1 | 2 | 3 | 4 | 5 |
| 3. The pavement surface is smooth, without obstacles, and it is safe to walk                                                                                                                       | 1 | 2 | 3 | 4 | 5 |
| 4. The traffic lights near the community give pedestrians enough time to cross the road                                                                                                            | 1 | 2 | 3 | 4 | 5 |
| 5. On the road, motor vehicles (such as cars, lorries, etc.) can yield to pedestrians                                                                                                              | 1 | 2 | 3 | 4 | 5 |

|                                                                                                                                                                     |   |   |   |   |   |
|---------------------------------------------------------------------------------------------------------------------------------------------------------------------|---|---|---|---|---|
| 6. On the road, non-motor vehicles (such as electric cars, bicycles, etc.) can yield to pedestrians                                                                 | 1 | 2 | 3 | 4 | 5 |
| <b>D Social Participation</b>                                                                                                                                       |   |   |   |   |   |
| 1. It is very convenient to get to places for leisure and cultural activities in the community                                                                      | 1 | 2 | 3 | 4 | 5 |
| 2. The community will choose leisure and cultural activities at times convenient to us                                                                              | 1 | 2 | 3 | 4 | 5 |
| 3. Easy access to information about community activities (e.g. participation modes, equipment using methods, transportation routes, etc.)                           | 1 | 2 | 3 | 4 | 5 |
| 4. Various leisure and sports activities are carried out in the community (such as singing, calligraphy, chess, sports competition, popular science lectures, etc.) | 1 | 2 | 3 | 4 | 5 |
| 5. There are many volunteer opportunities in the community                                                                                                          | 1 | 2 | 3 | 4 | 5 |
| 6. The government and the community will provide continuous help and support to those in need                                                                       | 1 | 2 | 3 | 4 | 5 |
| <b>E Social Inclusion and Health Services</b>                                                                                                                       |   |   |   |   |   |
| 1. People in the community are respectful and polite to the elderly                                                                                                 | 1 | 2 | 3 | 4 | 5 |
| 2. Staff in municipal, district, sub-district offices and public health institutions are friendly and helpful                                                       | 1 | 2 | 3 | 4 | 5 |
| 3. Community activities cater to the needs and preferences of people of all ages and are attractive                                                                 | 1 | 2 | 3 | 4 | 5 |
| 4. I feel respected in my social interactions                                                                                                                       | 1 | 2 | 3 | 4 | 5 |
| 5. To better serve the elderly, relevant departments and organizations regularly solicit opinions from the elderly                                                  | 1 | 2 | 3 | 4 | 5 |
| 6. The mass media (television, news, newspapers, radio programs, etc.) portray older people in a positive way                                                       | 1 | 2 | 3 | 4 | 5 |
| 7. Older persons have easy and safe access to health facilities and public service facilities (e.g. centers for the elderly, activity rooms for the elderly, etc.)  | 1 | 2 | 3 | 4 | 5 |
| 8. Staff in health facilities and public services are helpful                                                                                                       | 1 | 2 | 3 | 4 | 5 |
| 9. Where I live, I have easy access to information on health education, nutrition courses and physical therapy                                                      | 1 | 2 | 3 | 4 | 5 |
| 10. In public institutions (e.g. city, district, sub-district offices, etc.), Internet access is free or for a small fee                                            | 1 | 2 | 3 | 4 | 5 |

**Table S2: Chinese frailty screening-10 (CFS-10).** The following information is about your physical condition. Please check it and choose the actual option according to the description.

| Items                                                                                                                                                                                                                                                                                                                                                                                       | Options |      |
|---------------------------------------------------------------------------------------------------------------------------------------------------------------------------------------------------------------------------------------------------------------------------------------------------------------------------------------------------------------------------------------------|---------|------|
| (1) Do you have 5 or more chronic diseases? (hypertension, diabetes, stroke, cerebral infarction, cerebral hemorrhage), ischemic heart disease, chronic lung disease, tumor / cancer (except for mild skin cancer), congestive heart failure, angina, asthma, arthritis, kidney disease, cirrhosis, chronic liver disease, gastrointestinal diseases, Parkinson, musculoskeletal disorders; | 1.Yes   | 2.No |
| (2) Have you often felt tired in the last month? (tired, weak, weak, exhausted);                                                                                                                                                                                                                                                                                                            | 1.Yes   | 2.No |
| (3) Has your food intake decreased in the last three months? (due to anorexia, dyspepsia, bad mouth or dysphagia);                                                                                                                                                                                                                                                                          | 1.Yes   | 2.No |
| (4) Has your life been affected by vision problems?                                                                                                                                                                                                                                                                                                                                         | 1.Yes   | 2.No |
| (5) Has your life been affected by hearing problems?                                                                                                                                                                                                                                                                                                                                        | 1.Yes   | 2.No |
| (6) Do you find it difficult to climb ten steps or one floor without a break or the help of any auxiliary tools?                                                                                                                                                                                                                                                                            | 1.Yes   | 2.No |
| (7) Have you walked for 10 minutes or 400 meters in the past week?                                                                                                                                                                                                                                                                                                                          | 1.Yes   | 2.No |
| (8) Have you been distracted or hard to concentrate in the last month?                                                                                                                                                                                                                                                                                                                      | 1.Yes   | 2.No |
| (9) Do you often get the wrong date or get lost in the last month?                                                                                                                                                                                                                                                                                                                          | 1.Yes   | 2.No |
| (10) In the last month, have you done anything that you are not interested in?                                                                                                                                                                                                                                                                                                              | 1.Yes   | 2.No |

**Table S3: Description of mentioned Classification variables.**

| <b>Variables</b>           | <b>The Specific Classification</b>                                                                     |
|----------------------------|--------------------------------------------------------------------------------------------------------|
| Age(years)                 | 1='65~'; 2='70~'; 3='75~'; 4='80~';                                                                    |
| Gender                     | 1='Male'; 2='Female';                                                                                  |
| Marital status             | 2='In marriage'; other='Not in marriage'(including unmarried, divorced, and widowed);                  |
| Education level            | 1=' Below Primary School'; 2=' Primary School'; 3=' Junior high school'; 4-7=' High school and above'; |
| Self-rated health          | 1-2='Poor or Worse'; 3='General'; 4='Better'; 5='Perfect';                                             |
| Smoking                    | 1='No'; 2='Used to'; 3='Smoking';                                                                      |
| Drinking                   | 1='No'; 2-5='Drinking';                                                                                |
| Vegetable intake           | 1-2='Low'; 3-5='Adequate';                                                                             |
| Fruit intake               | 1-2='Low'; 3-5='Adequate';                                                                             |
| Physical activity          | 0='Inactive'; 1='Active';                                                                              |
| Chronic disease            | 1='Without NCD'; 2='With one diseases'; 3='With Two or more';                                          |
| Depression                 | 0='No'; 1='Yes';                                                                                       |
| Cognitive Function         | 0='Normal'; 1='Cognitive decline';                                                                     |
| Frail status               | 0='Robust'; 1='Frail';                                                                                 |
| Individual-level AFC Grade | 1='First quartile'; 2='Second quartile'; 3='Third quartile'; 4='Fourth quartile';                      |
| Community-level AFC Grade  | 1='First quartile'; 2='Second quartile'; 3='Third quartile'; 4='Fourth quartile';                      |
